# Supplementary material
Source: Research Square preprint supplement (doi:10.21203/rs.3.rs-9684695/v1)
Supplement: Supplementary file 1 [file 60d60d2139b4cd3ceafa241b.docx]

Table 1. Demographic characteristics of decedents with MM and DM in the United States, 1999–2020.

| Variable | N | AAMR per 100,000 (95% CI) | AAPC (95% CI) |
| --- | --- | --- | --- |
| MM alone  MM + DM | 245235  12296 | 9.53  0.45 | -0.01 (-1.25 - -0.90)  0.23 (-0.25 - 0.71) |
| Sex  Male  Female | 6980  5316 | 0.64  0.35 | 0.50 (-0.14 - 1.16)  -0.70 (-1.43 - 0.13) |
| Race  Non Hispanic White  Non Hispanic Black  Asian or Pacific  American Indian  Hispanic | 7914  2810  309  109  12296 | 0.36  1.16  0.29  0.82  0.45 | 0.28 (-0.48 - 1.10)  -0.75 (-1.73 - 0.34)  Could not calculate American Indian or Alaska Native and Asian or Pacific Islander  -0.58 (-1.64 - 0.48) |
| US census region   North east  Midwest  South  West | 1973  2938  4614  2771 | 0.36  0.48  0.46  0.49 | -0.40 (-1.16 - 0.41)  -0.48 (-1.33 - 0.37)  0.50 (-0.30 - 1.48)  0.40 (-0.30 - 1.25) |
| 2013 urbanization   Urban  Rural | 9707  2589 | 0.45  0.55 | 0.22 (-0.20 - 0.63)  0.62 (-0.31 - 1.67) |

AAMR, age-adjusted mortality rate; AAPC, average annual percent change; CI, confidence interval.
